# Supplementary material
Source: PubMed Central journal article supplement (PMC7454020)
Supplement: JCOPDF-7-107-s001.pdf [file JCOPDF-7-107-s001.pdf]

**Online Data Supplement**

**Supplemental Table 1: Baseline Characteristics of Cohort by Income/Stress Category**

| Variable                      | Low stress<br>High<br>income<br>(n=39) | Low stress<br>Low<br>income<br>(n=24) | High stress<br>High<br>income<br>(n=24) | High<br>stress<br>Low<br>income<br>(n=39) | P value |
|-------------------------------|----------------------------------------|---------------------------------------|-----------------------------------------|-------------------------------------------|---------|
| <b>Demographics</b>           |                                        |                                       |                                         |                                           |         |
| Age, mean (SD)^               | 69.9 (8.6)                             | 64.9 (7.8)                            | 68.1 (8.3)                              | 61.5 (7.0)                                | <0.001  |
| Female sex, N(%)              | 17 (43.6)                              | 7 (29.2)                              | 16 (66.7)                               | 23 (59.0)                                 | 0.03    |
| Race, N(%)                    |                                        |                                       |                                         |                                           | 0.04    |
| Non-Hispanic White            | 31 (79.5)                              | 12 (50.0)                             | 21 (87.5)                               | 22 (56.4)                                 |         |
| African-American              | 7 (17.9)                               | 10 (41.7)                             | 3 (12.5)                                | 15 (38.5)                                 |         |
| Other                         | 1 (2.6)                                | 2 (8.3)                               | 0 (0)                                   | 2 (5.1)                                   |         |
| <b>Smoking History</b>        |                                        |                                       |                                         |                                           |         |
| Current Tobacco Use, N(%)     | 11 (28.2)                              | 10 (41.7)                             | 4 (16.7)                                | 26 (66.7)                                 | <0.001  |
| Age started smoking, mean(SD) | 16.4 (2.9)                             | 17.3 (9.9)                            | 18.0 (3.1)                              | 15.4 (4.5)                                | 0.3     |
| Years smoked, mean(SD)        | 45.5 (11.6)                            | 42.4<br>(11.4)                        | 41.5 (10.0)                             | 43.9 (7.9)                                | 0.4     |
| <b>Comorbidities, N(%)</b>    |                                        |                                       |                                         |                                           |         |
| Coronary artery disease       | 6 (15.4)                               | 6 (27.3)                              | 6 (25.0)                                | 3 (7.7)                                   | 0.2     |
| Congestive heart failure      | 7 (17.9)                               | 2 (9.1)                               | 2 (8.3)                                 | 2 (5.1)                                   | 0.3     |
| Cerebral vascular accident    | 2 (5.1)                                | 1 (4.5)                               | 1 (4.2)                                 | 4 (10.3)                                  | 0.7     |
| Hypertension                  | 27 (69.2)                              | 15 (68.2)                             | 14 (58.3)                               | 22 (56.4)                                 | 0.6     |
| Diabetes                      | 6 (15.4)                               | 6 (27.3)                              | 3 (12.5)                                | 7 (17.9)                                  | 0.6     |
| Osteoarthritis                | 7 (17.9)                               | 5 (22.7)                              | 4 (16.7)                                | 4 (10.3)                                  | 0.6     |
| Osteoporosis                  | 7 (17.9)                               | 2 (9.1)                               | 5 (20.8)                                | 2 (5.1)                                   | 0.2     |
| Hyperlipidemia                | 24 (61.5)                              | 4 (18.2)                              | 12 (50.0)                               | 17 (43.6)                                 | 0.01    |

|                                                                    |             |                |             |                |       |
|--------------------------------------------------------------------|-------------|----------------|-------------|----------------|-------|
| Gastroesophageal reflux disease                                    | 12 (30.8)   | 10 (45.5)      | 13 (54.2)   | 14 (35.9)      | 0.3   |
| Peptic ulcer disease                                               | 1 (2.6)     | 1 (4.5)        | 0 (0)       | 2 (5.1)        | 0.7   |
| Obstructive sleep apnea                                            | 5 (12.8)    | 2 (9.1)        | 9 (37.5)    | 8 (20.5)       | 0.05  |
| Peripheral vascular disease                                        | 2 (5.1)     | 2 (9.1)        | 1 (4.2)     | 0 (0)          | 0.4   |
| Chronic kidney disease                                             | 3 (7.7)     | 2 (9.1)        | 3 (12.5)    | 1 (2.6)        | 0.5   |
| Anxiety                                                            | 9 (23.1)    | 4 (18.2)       | 6 (25.0)    | 13 (33.3)      | 0.6   |
| Depression                                                         | 9 (23.1)    | 6 (27.3)       | 7 (29.2)    | 16 (41.0)      | 0.4   |
| <b>Clinical Characteristics</b>                                    |             |                |             |                |       |
| Self rated health, N(%)                                            |             |                |             |                | 0.2   |
| Excellent                                                          | 1 (2.6)     | 0 (0)          | 0 (0)       | 0 (0)          |       |
| Very good                                                          | 5 (12.8)    | 1 (4.2)        | 2 (8.3)     | 1 (2.6)        |       |
| Good                                                               | 14 (35.9)   | 8 (33.3)       | 5 (20.8)    | 8 (20.5)       |       |
| Fair                                                               | 16 (41.0)   | 15 (62.5)      | 13 (54.2)   | 21 (53.8)      |       |
| Poor                                                               | 3 (7.7)     | 0 (0)          | 4 (16.7)    | 9 (23.1)       |       |
| BMI, mean (SD)                                                     | 27.7 (5.3)  | 26.9 (6.4)     | 28.7 (6.6)  | 26.3 (7.3)     | 0.5   |
| FEV1 %, mean (SD)                                                  | 47.7 (21.5) | 44.7<br>(18.7) | 44.3 (18.7) | 48.0<br>(18.0) | 0.8   |
| MMRC score, mean(SD)                                               | 1.87 (1.1)  | 2.17 (1.1)     | 2.13 (1.3)  | 2.31 (1.2)     | 0.4   |
| CAT, mean (SD)                                                     | 19.5 (7.9)  | 20.3 (7.0)     | 22.6 (7.6)  | 26.4 (9.3)     | 0.003 |
| Oxygen requirement, N(%)                                           | 18 (47.4)   | 10 (41.7)      | 12 (50.0)   | 12 (32.4)      | 0.5   |
| Test of Adherence to Inhalers, mean (SD)^                          | 48.0 (3.5)  | 47.3 (6.5)     | 48.2 (3.0)  | 42.9<br>(13.6) | 0.4   |
| Moderate exacerbations in prior 1 year, mean (SD)^                 | 2.49 (3.2)  | 1.58 (1.8)     | 2.57 (1.9)  | 2.03 (2.4)     | 0.3   |
| COPD related ED visits in prior 2 years, mean(SD)^                 | 0.18 (0.5)  | 0.46 (0.8)     | 1.58 (4.0)  | 1.24 (1.6)     | 0.002 |
| COPD hospitalizations in prior 2 years, mean (SD)^                 | 0.38 (1.0)  | 0.88<br>(1.19) | 1.13 (1.3)  | 1.3 (2.8)      | 0.03  |
| All-cause hospitalizations in prior 2 years, mean (SD)^            | 0.67 (1.2)  | 0.91 (1.2)     | 1.50 (1.4)  | 1.66 (2.7)     | 0.02  |
| COPD healthcare utilization frequency in prior 2 years, mean (SD)^ | 0.56 (1.1)  | 1.33 (1.8)     | 2.7 (4.6)   | 2.5 (3.4)      | 0.004 |
| Use of COPD acute care services in prior 2 years, N (%)            | 12 (30.8)   | 11 (45.8)      | 14 (58.3)   | 26 (66.7)      | 0.01  |

Total N for covariates with missing data: Comorbidities (n=124), MMRC (n=123), CAT (n=121), Oxygen requirement (n=123)  
^Kruskal-Wallis H test used

**Supplemental Table 2: Social Determinant Characteristics of Cohort by Income/Stress Category**

| Social Determinant Variable                 | Low stress<br>High income<br>(n=39) | Low stress<br>Low income<br>(n=24) | High stress<br>High income<br>(n=24) | High stress<br>Low income<br>(n=39) | P value |
|---------------------------------------------|-------------------------------------|------------------------------------|--------------------------------------|-------------------------------------|---------|
| <b>Social Determinants of Health</b>        |                                     |                                    |                                      |                                     |         |
| Transportation, N(%)                        |                                     |                                    |                                      |                                     | 0.02    |
| <i>Private vehicle (self)</i>               | 30 (76.9)                           | 15 (62.5)                          | 18 (75.0)                            | 17 (44.7)                           |         |
| <i>Private vehicle (other)</i>              | 9 (23.1)                            | 4 (16.7)                           | 6 (25.0)                             | 14 (36.8)                           |         |
| <i>Public transportation</i>                | 0 (0)                               | 5 (20.8)                           | 0 (0)                                | 6 (15.8)                            |         |
| <i>Walk/bike</i>                            | 0 (0)                               | 0 (0)                              | 0 (0)                                | 1 (2.6)                             |         |
| Marital Status, N(%)                        |                                     |                                    |                                      |                                     | <0.001  |
| <i>Married, living together, common law</i> | 23 (59.0)                           | 4 (16.7)                           | 20 (83.3)                            | 10 (25.6)                           |         |
| <i>Single</i>                               | 5 (12.8)                            | 10 (41.7)                          | 2 (8.3)                              | 13 (33.3)                           |         |
| <i>Separated/divorced/widowed</i>           | 11 (28.2)                           | 10 (41.7)                          | 2 (8.3)                              | 16 (41.0)                           |         |
| Social support, mean (SD)                   |                                     |                                    |                                      |                                     |         |
| <i>Emotional<sup>^</sup></i>                | 4.16 (1.1)                          | 3.71 (1.5)                         | 4.05 (0.9)                           | 3.71 (1.3)                          | 0.4     |
| <i>Tangible<sup>^</sup></i>                 | 4.24 (1.2)                          | 3.43 (1.6)                         | 4.06 (1.2)                           | 3.51 (1.3)                          | 0.02    |
| <i>Affectionate</i>                         | 4.47 (1.2)                          | 3.52 (1.6)                         | 3.81 (1.5)                           | 3.86 (1.3)                          | 0.05    |
| <i>Positive interaction<sup>^</sup></i>     | 4.39 (1.0)                          | 3.49 (1.6)                         | 3.94 (1.3)                           | 3.53 (1.5)                          | 0.04    |
| <i>Overall Functional Social Support</i>    | 4.28 (1.1)                          | 3.60 (1.5)                         | 4.10 (1.0)                           | 3.66 (1.1)                          | 0.07    |
| Lack of health insurance, N(%)              | 1 (2.6)                             | 2 (8.3)                            | 0 (0)                                | 8 (20.5)                            | 0.01    |
| History of homelessness, N(%)               | 2 (5.3)                             | 3 (12.5)                           | 0 (0)                                | 6 (16.7)                            | 0.1     |
| Food insecurity, N(%)                       | 5 (12.8)                            | 8 (33.3)                           | 1 (4.2)                              | 21 (53.8)                           | <0.001  |
| Financial Strain, N (%)                     |                                     |                                    |                                      |                                     |         |
| <i>Unable to afford:</i>                    |                                     |                                    |                                      |                                     |         |
| <i>Prescription Medicine</i>                | 8 (21.1)                            | 7 (29.2)                           | 1 (4.2)                              | 16 (41.0)                           | 0.01    |
| <i>Mental health care</i>                   | 0 (0)                               | 0 (0)                              | 1 (4.3)                              | 6 (16.7)                            | 0.01    |
| <i>Dental care</i>                          | 3 (7.7)                             | 4 (18.2)                           | 1(4.3)                               | 15 (41.7)                           | <0.001  |
| <i>Specialist care</i>                      | 0 (0)                               | 1 (4.5)                            | 0 (0)                                | 8 (22.2)                            | 0.001   |

|                                                              |            |            |            |            |        |
|--------------------------------------------------------------|------------|------------|------------|------------|--------|
| <i>Follow-up care</i>                                        | 1 (2.6)    | 2 (9.5)    | 0 (0)      | 7 (19.4)   | 0.02   |
| <i>Took less medicine to save money</i>                      | 6 (15.4)   | 3 (12.5)   | 3 (13.0)   | 3 (8.1)    | 0.8    |
| <i>Delayed filling Rx to save money</i>                      | 5 (12.8)   | 5 (20.8)   | 4 (17.4)   | 8 (22.2)   | 0.7    |
| <i>Asked doctor for lower cost medication</i>                | 15 (38.5)  | 8 (33.3)   | 8 (34.8)   | 13 (36.1)  | 0.98   |
| <i>Bought Rx from another country</i>                        | 3 (7.7)    | 1 (4.2)    | 0 (0)      | 1 (2.8)    | 0.5    |
| Education, N(%)                                              |            |            |            |            | <0.001 |
| <i>Less than HS</i>                                          | 3 (7.7)    | 4 (16.7)   | 1 (4.2)    | 15 (38.5)  |        |
| <i>HS Graduate</i>                                           | 21 (53.8)  | 16 (66.7)  | 11 (45.8)  | 20 (51.3)  |        |
| <i>More than HS</i>                                          | 15 (38.5)  | 4 (16.7)   | 12 (50.0)  | 4 (10.3)   |        |
| Neighborhood disorder, mean (SD)                             | 21.3 (6.5) | 25.7 (6.7) | 22.4 (5.5) | 30.9 (9.0) | <0.001 |
| No regular access to health care, N(%)                       | 0 (0)      | 6 (25.0)   | 3 (13.0)   | 7 (17.9)   | 0.02   |
| Perceived discrimination, mean (SD)^                         | 10.8 (3.7) | 13.3 (7.1) | 11.6 (5.2) | 15.5 (8.6) | 0.01   |
| AUDIT Score (EtOH use), mean (SD)                            | 1.82 (3.5) | 1.21 (1.7) | 2.3 (2.8)  | 1.7 (3.5)  | 0.7    |
| Illicit Drug Use in past 5 years, (one or more events), N(%) | 2 (5.1)    | 2 (8.3)    | 0 (0)      | 11 (28.2)  | 0.002  |
| Perceived Stress Level, mean (SD)                            | 9.6 (4.6)  | 9.5 (4.2)  | 22.4 (4.5) | 22.0 (7.6) | <0.001 |

Total N for covariates with missing data: Transportation (n=125), Social support (n=117), history of homelessness (n=122), prescription medicine (n=125), mental health care (n=118), dental care (n=120), specialist care (n=119), follow-up care (n=118), took less medicine to save money (n=123), delayed filling Rx to save money (n=122), asked doctor for lower cost medication (n=122), bought Rx from another country (n=122), neighborhood disorder (n=120), no regular access to health care, (n=124), perceived discrimination, (n=114), Illicit Drug Use in past 5 years, (n=121).

^Kruskal-Wallis H test used
